# Supplementary material
Source: publisher figshare collection journal article supplement (https://acs.figshare.com/ndownloader/files/5739546)
Supplement: Supplementary file 1 [file 5739546]

 
data_pl232 
 
_audit_creation_method            SHELXL-97 
_chemical_name_systematic 
; 
Molybdenum,(2,2-dimethylpropyl)nitrosyl
[(5-.eta.)pentamethylcyclopentadienyl]phenyl 
; 
_chemical_name_common             'Cp*Mo(NO)(CH2CMe3)(C6H5) (6)' 
_chemical_formula_moiety          C21H31MoNO 
_chemical_formula_sum 
 'C21 H31 Mo N O' 
_chemical_formula_weight          409.41 
 
loop_ 
 _atom_type_symbol 
 _atom_type_description 
 _atom_type_scat_dispersion_real 
 _atom_type_scat_dispersion_imag 
 _atom_type_scat_source 
 'C'  'C'   0.0033   0.0016 
 'International Tables Vol C Tables 4.2.6.8 and 6.1.1.4' 
 'H'  'H'   0.0000   0.0000 
 'International Tables Vol C Tables 4.2.6.8 and 6.1.1.4' 
 'N'  'N'   0.0061   0.0033 
 'International Tables Vol C Tables 4.2.6.8 and 6.1.1.4' 
 'O'  'O'   0.0106   0.0060 
 'International Tables Vol C Tables 4.2.6.8 and 6.1.1.4' 
 'Mo'  'Mo'  -1.6832   0.6857 
 'International Tables Vol C Tables 4.2.6.8 and 6.1.1.4' 
 
_symmetry_cell_setting            Monoclinic 
_symmetry_space_group_name_H-M    P2(1)/c 
 
loop_ 
 _symmetry_equiv_pos_as_xyz 
 'x, y, z' 
 '-x, y+1/2, -z+1/2' 
 '-x, -y, -z' 
 'x, -y-1/2, z-1/2' 
 
_cell_length_a                    10.2911(5) 
_cell_length_b                    14.6191(6) 
_cell_length_c                    14.4274(8) 
_cell_angle_alpha                 90.00 
_cell_angle_beta                  108.209(2) 
_cell_angle_gamma                 90.00 
_cell_volume                      2061.86(17) 
_cell_formula_units_Z             4 
_cell_measurement_temperature     173(2) 
_cell_measurement_reflns_used     13372 
_cell_measurement_theta_min       2.56 
_cell_measurement_theta_max       27.88 
 
_exptl_crystal_description        chip 
_exptl_crystal_colour             red 
_exptl_crystal_size_max           0.30 
_exptl_crystal_size_mid           0.20 
_exptl_crystal_size_min           0.20 
_exptl_crystal_density_meas       ? 
_exptl_crystal_density_diffrn     1.319 
_exptl_crystal_density_method     'not measured' 
_exptl_crystal_F_000              856 
_exptl_absorpt_coefficient_mu     0.643 
_exptl_absorpt_correction_type    multi-scan 
_exptl_absorpt_correction_T_min   0.8054 
_exptl_absorpt_correction_T_max   1.0000 
 
_exptl_special_details 
; 
 ? 
; 
 
_diffrn_ambient_temperature       173(2) 
_diffrn_radiation_wavelength      0.71069 
_diffrn_radiation_type            MoK\a 
_diffrn_radiation_source          'fine-focus sealed tube' 
_diffrn_radiation_monochromator   graphite 
_diffrn_measurement_device_type   ? 
_diffrn_measurement_method        ? 
_diffrn_detector_area_resol_mean  ? 
_diffrn_standards_number          ? 
_diffrn_standards_interval_count  ? 
_diffrn_standards_interval_time   ? 
_diffrn_standards_decay_%         ? 
_diffrn_reflns_number             4610 
_diffrn_reflns_av_R_equivalents   0.0000 
_diffrn_reflns_av_sigmaI/netI     0.0441 
_diffrn_reflns_limit_h_min        -13 
_diffrn_reflns_limit_h_max        13 
_diffrn_reflns_limit_k_min        -16 
_diffrn_reflns_limit_k_max        19 
_diffrn_reflns_limit_l_min        -17 
_diffrn_reflns_limit_l_max        16 
_diffrn_reflns_theta_min          2.56 
_diffrn_reflns_theta_max          27.88 
_reflns_number_total              4610 
_reflns_number_gt                 3981 
_reflns_threshold_expression      >2sigma(I) 
 
_computing_data_collection        ? 
_computing_cell_refinement        ? 
_computing_data_reduction         ? 
_computing_structure_solution     'SHELXS-97 (Sheldrick, 1990)' 
_computing_structure_refinement   'SHELXL-97 (Sheldrick, 1997)' 
_computing_molecular_graphics     ? 
_computing_publication_material   ? 
 
_refine_special_details 
; 
 Refinement of F^2^ against ALL reflections.  The weighted R-factor wR and 
 goodness of fit S are based on F^2^, conventional R-factors R are based 
 on F, with F set to zero for negative F^2^. The threshold expression of 
 F^2^ > 2sigma(F^2^) is used only for calculating R-factors(gt) etc. and is 
 not relevant to the choice of reflections for refinement.  R-factors based 
 on F^2^ are statistically about twice as large as those based on F, and R- 
 factors based on ALL data will be even larger. 
; 
 
_refine_ls_structure_factor_coef  Fsqd  
_refine_ls_matrix_type            full 
_refine_ls_weighting_scheme 
 'calc w=1/[\s^2^(Fo^2^)+(0.0381P)^2^+0.0000P] where P=(Fo^2^+2Fc^2^)/3' 
_atom_sites_solution_primary      direct 
_atom_sites_solution_secondary    difmap 
_atom_sites_solution_hydrogens    geom 
_refine_ls_hydrogen_treatment     mixed 
_refine_ls_extinction_method      none 
_refine_ls_extinction_coef        ? 
_refine_ls_number_reflns          4610 
_refine_ls_number_parameters      253 
_refine_ls_number_restraints      0 
_refine_ls_R_factor_all           0.0334 
_refine_ls_R_factor_gt            0.0285 
_refine_ls_wR_factor_ref          0.0780 
_refine_ls_wR_factor_gt           0.0762 
_refine_ls_goodness_of_fit_ref    1.060 
_refine_ls_restrained_S_all       1.060 
_refine_ls_shift/su_max           0.004 
_refine_ls_shift/su_mean          0.001 
 
loop_ 
 _atom_site_label 
 _atom_site_type_symbol 
 _atom_site_fract_x 
 _atom_site_fract_y 
 _atom_site_fract_z 
 _atom_site_U_iso_or_equiv 
 _atom_site_adp_type 
 _atom_site_occupancy 
 _atom_site_calc_flag 
 _atom_site_refinement_flags 
 _atom_site_disorder_assembly 
 _atom_site_disorder_group 
Mo1 Mo 0.910818(15) 0.187513(10) 0.201945(11) 0.01552(7) Uani 1 d . . . 
O1 O 0.9753(2) 0.22794(14) 0.01978(14) 0.0492(5) Uani 1 d . . . 
N1 N 0.95637(18) 0.22063(12) 0.09817(14) 0.0276(4) Uani 1 d . . . 
C1 C 0.7906(2) 0.06173(12) 0.12394(14) 0.0204(4) Uani 1 d . . . 
C2 C 0.9260(2) 0.03307(12) 0.17867(15) 0.0219(4) Uani 1 d . . . 
C3 C 0.9385(2) 0.04024(12) 0.27959(14) 0.0217(4) Uani 1 d . . . 
C4 C 0.8136(2) 0.07468(12) 0.28735(13) 0.0195(4) Uani 1 d . . . 
C5 C 0.72103(19) 0.08658(12) 0.19081(14) 0.0190(4) Uani 1 d . . . 
C6 C 0.7299(2) 0.05995(15) 0.01469(15) 0.0316(5) Uani 1 d . . . 
H6A H 0.6967 -0.0018 -0.0065 0.047 Uiso 1 calc R . . 
H6B H 0.7999 0.0772 -0.0151 0.047 Uiso 1 calc R . . 
H6C H 0.6536 0.1033 -0.0056 0.047 Uiso 1 calc R . . 
C7 C 1.0293(2) -0.00533(15) 0.13548(17) 0.0330(5) Uani 1 d . . . 
H7A H 1.1184 -0.0096 0.1862 0.049 Uiso 1 calc R . . 
H7B H 1.0367 0.0348 0.0830 0.049 Uiso 1 calc R . . 
H7C H 1.0003 -0.0664 0.1091 0.049 Uiso 1 calc R . . 
C8 C 1.0555(2) 0.00646(15) 0.36399(17) 0.0343(5) Uani 1 d . . . 
H8A H 1.0762 0.0516 0.4168 0.051 Uiso 1 calc R . . 
H8B H 1.1363 -0.0025 0.3428 0.051 Uiso 1 calc R . . 
H8C H 1.0303 -0.0518 0.3874 0.051 Uiso 1 calc R . . 
C9 C 0.7818(2) 0.08929(17) 0.38065(16) 0.0333(5) Uani 1 d . . . 
H9A H 0.7659 0.0301 0.4070 0.050 Uiso 1 calc R . . 
H9B H 0.6996 0.1273 0.3681 0.050 Uiso 1 calc R . . 
H9C H 0.8590 0.1201 0.4279 0.050 Uiso 1 calc R . . 
C10 C 0.5724(2) 0.11066(14) 0.16620(17) 0.0284(4) Uani 1 d . . . 
H10A H 0.5395 0.1353 0.0997 0.043 Uiso 1 calc R . . 
H10B H 0.5607 0.1567 0.2123 0.043 Uiso 1 calc R . . 
H10C H 0.5200 0.0557 0.1705 0.043 Uiso 1 calc R . . 
C11 C 0.74868(18) 0.28591(12) 0.17692(14) 0.0184(4) Uani 1 d . . . 
C12 C 0.6761(2) 0.32113(13) 0.08544(17) 0.0251(4) Uani 1 d . . . 
H12 H 0.700(3) 0.2929(18) 0.033(2) 0.041(8) Uiso 1 d . . . 
C13 C 0.5766(2) 0.38817(15) 0.07431(18) 0.0329(5) Uani 1 d . . . 
H13 H 0.525(3) 0.4068(17) 0.011(2) 0.039(7) Uiso 1 d . . . 
C14 C 0.5480(2) 0.42178(15) 0.15516(19) 0.0340(5) Uani 1 d . . . 
H14 H 0.482(3) 0.4642(17) 0.145(2) 0.040(7) Uiso 1 d . . . 
C15 C 0.6168(2) 0.38823(15) 0.24633(18) 0.0308(5) Uani 1 d . . . 
H15 H 0.595(3) 0.409(2) 0.3020(19) 0.050(9) Uiso 1 d . . . 
C16 C 0.7163(2) 0.32074(13) 0.25719(16) 0.0222(4) Uani 1 d . . . 
H16 H 0.762(3) 0.3008(17) 0.315(2) 0.040(8) Uiso 1 d . . . 
C17 C 1.08997(19) 0.22508(15) 0.31149(18) 0.0275(5) Uani 1 d . . . 
H17A H 1.034(3) 0.282(2) 0.306(2) 0.049(8) Uiso 1 d . . . 
H17B H 1.088(3) 0.1955(15) 0.370(2) 0.029(7) Uiso 1 d . . . 
C18 C 1.2347(2) 0.25091(15) 0.3130(2) 0.0371(6) Uani 1 d . . . 
C19 C 1.3141(3) 0.1629(2) 0.3122(3) 0.0527(8) Uani 1 d . . . 
H19A H 1.2784 0.1335 0.2482 0.079 Uiso 1 calc R . . 
H19B H 1.3036 0.1214 0.3627 0.079 Uiso 1 calc R . . 
H19C H 1.4111 0.1773 0.3252 0.079 Uiso 1 calc R . . 
C20 C 1.3063(3) 0.3019(2) 0.4078(3) 0.0741(12) Uani 1 d . . . 
H20A H 1.4008 0.3154 0.4110 0.111 Uiso 1 calc R . . 
H20B H 1.3061 0.2637 0.4636 0.111 Uiso 1 calc R . . 
H20C H 1.2577 0.3592 0.4096 0.111 Uiso 1 calc R . . 
C21 C 1.2353(3) 0.3108(2) 0.2271(3) 0.0746(12) Uani 1 d . . . 
H21A H 1.1931 0.2775 0.1661 0.112 Uiso 1 calc R . . 
21B H 1.3297 0.3266 0.2321 0.112 Uiso 1 calc R . . 
H21C H 1.1833 0.3668 0.2278 0.112 Uiso 1 calc R . . 
 
loop_ 
 _atom_site_aniso_label 
 _atom_site_aniso_U_11 
 _atom_site_aniso_U_22 
 _atom_site_aniso_U_33 
 _atom_site_aniso_U_23 
 _atom_site_aniso_U_13 
 _atom_site_aniso_U_12 
Mo1 0.01577(10) 0.01466(10) 0.01738(11) 0.00048(5) 0.00699(7) 0.00208(5) 
O1 0.0605(12) 0.0633(12) 0.0381(11) 0.0179(9) 0.0361(9) 0.0093(9) 
N1 0.0299(9) 0.0258(8) 0.0329(11) 0.0079(7) 0.0182(8) 0.0067(7) 
C1 0.0278(10) 0.0165(8) 0.0152(10) -0.0021(7) 0.0045(7) 0.0004(7) 
C2 0.0289(10) 0.0156(8) 0.0211(10) 0.0002(7) 0.0076(8) 0.0056(7) 
C3 0.0290(10) 0.0172(8) 0.0162(10) 0.0037(7) 0.0031(8) 0.0025(7) 
C4 0.0248(9) 0.0205(8) 0.0133(9) 0.0015(7) 0.0060(7) -0.0046(7) 
C5 0.0226(9) 0.0171(8) 0.0163(9) -0.0004(6) 0.0045(7) -0.0038(7) 
C6 0.0404(12) 0.0352(11) 0.0155(10) -0.0035(8) 0.0035(9) 0.0026(10) 
C7 0.0392(12) 0.0301(10) 0.0319(13) -0.0030(9) 0.0145(10) 0.0142(9) 
C8 0.0366(12) 0.0334(11) 0.0244(12) 0.0115(9) -0.0027(9) 0.0042(9) 
C9 0.0401(12) 0.0458(13) 0.0171(11) -0.0017(9) 0.0135(9) -0.0093(10) 
C10 0.0198(9) 0.0318(10) 0.0311(12) 0.0009(8) 0.0043(8) -0.0059(8) 
C11 0.0155(8) 0.0151(7) 0.0252(11) 0.0009(7) 0.0072(7) 0.0003(6) 
C12 0.0287(11) 0.0226(9) 0.0246(12) 0.0054(7) 0.0093(9) 0.0035(8) 
C13 0.0297(11) 0.0273(10) 0.0344(13) 0.0097(9) -0.0005(10) 0.0042(8) 
C14 0.0224(10) 0.0256(10) 0.0506(15) 0.0000(9) 0.0066(10) 0.0091(8) 
C15 0.0264(11) 0.0309(11) 0.0354(13) -0.0103(9) 0.0103(9) 0.0056(8) 
C16 0.0189(9) 0.0260(9) 0.0199(11) -0.0030(7) 0.0033(8) 0.0015(7) 
C17 0.0169(9) 0.0238(10) 0.0384(14) -0.0068(8) 0.0036(9) 0.0032(7) 
C18 0.0160(9) 0.0308(11) 0.0600(17) -0.0055(10) 0.0053(10) 0.0010(8) 
C19 0.0254(12) 0.0504(14) 0.083(2) -0.0078(15) 0.0178(14) 0.0121(11) 
C20 0.0295(14) 0.073(2) 0.109(3) -0.045(2) 0.0057(17) -0.0122(13) 
C21 0.0327(15) 0.078(2) 0.109(3) 0.040(2) 0.0153(18) -0.0146(13) 
 
_geom_special_details 
; 
 All esds (except the esd in the dihedral angle between two l.s. planes) 
 are estimated using the full covariance matrix.  The cell esds are taken 
 into account individually in the estimation of esds in distances, angles 
 and torsion angles; correlations between esds in cell parameters are only 
 used when they are defined by crystal symmetry.  An approximate (isotropic) 
 treatment of cell esds is used for estimating esds involving l.s. planes. 
; 
 
loop_ 
 _geom_bond_atom_site_label_1 
 _geom_bond_atom_site_label_2 
 _geom_bond_distance 
 _geom_bond_site_symmetry_2 
 _geom_bond_publ_flag 
Mo1 N1 1.7705(18) . ? 
Mo1 C17 2.092(2) . ? 
Mo1 C11 2.1464(17) . ? 
Mo1 C2 2.2951(18) . ? 
Mo1 C1 2.3038(18) . ? 
Mo1 C3 2.4025(18) . ? 
Mo1 C5 2.4128(18) . ? 
Mo1 C4 2.4514(18) . ? 
Mo1 H17A 2.14(3) . ? 
O1 N1 1.211(2) . ? 
C1 C5 1.417(3) . ? 
C1 C2 1.433(3) . ? 
C1 C6 1.503(3) . ? 
C2 C3 1.425(3) . ? 
C2 C7 1.499(3) . ? 
C3 C4 1.417(3) . ? 
C3 C8 1.503(3) . ? 
C4 C5 1.431(3) . ? 
C4 C9 1.497(3) . ? 
C5 C10 1.500(3) . ? 
C6 H6A 0.9800 . ? 
C6 H6B 0.9800 . ? 
C6 H6C 0.9800 . ? 
C7 H7A 0.9800 . ? 
C7 H7B 0.9800 . ? 
C7 H7C 0.9800 . ? 
C8 H8A 0.9800 . ? 
C8 H8B 0.9800 . ? 
C8 H8C 0.9800 . ? 
C9 H9A 0.9800 . ? 
C9 H9B 0.9800 . ? 
C9 H9C 0.9800 . ? 
C10 H10A 0.9800 . ? 
C10 H10B 0.9800 . ? 
C10 H10C 0.9800 . ? 
C11 C12 1.396(3) . ? 
C11 C16 1.397(3) . ? 
C12 C13 1.390(3) . ? 
C12 H12 0.96(3) . ? 
C13 C14 1.380(3) . ? 
C13 H13 0.94(3) . ? 
C14 C15 1.375(3) . ? 
C14 H14 0.90(3) . ? 
C15 C16 1.395(3) . ? 
C15 H15 0.94(3) . ? 
C16 H16 0.86(3) . ? 
C17 C18 1.531(3) . ? 
C17 H17A 1.00(3) . ? 
C17 H17B 0.96(3) . ? 
C18 C21 1.518(4) . ? 
C18 C19 1.526(3) . ? 
C18 C20 1.529(4) . ? 
C19 H19A 0.9800 . ? 
C19 H19B 0.9800 . ? 
C19 H19C 0.9800 . ? 
C20 H20A 0.9800 . ? 
C20 H20B 0.9800 . ? 
C20 H20C 0.9800 . ? 
C21 H21A 0.9800 . ? 
C21 H21B 0.9800 . ? 
C21 H21C 0.9800 . ? 
 
loop_ 
 _geom_angle_atom_site_label_1 
 _geom_angle_atom_site_label_2 
 _geom_angle_atom_site_label_3 
 _geom_angle 
 _geom_angle_site_symmetry_1 
 _geom_angle_site_symmetry_3 
 _geom_angle_publ_flag 
N1 Mo1 C17 99.40(9) . . ? 
N1 Mo1 C11 94.12(7) . . ? 
C17 Mo1 C11 113.98(8) . . ? 
N1 Mo1 C2 95.57(8) . . ? 
C17 Mo1 C2 106.53(8) . . ? 
C11 Mo1 C2 136.02(7) . . ? 
N1 Mo1 C1 92.79(8) . . ? 
C17 Mo1 C1 142.22(8) . . ? 
C11 Mo1 C1 100.50(7) . . ? 
C2 Mo1 C1 36.30(7) . . ? 
N1 Mo1 C3 127.96(7) . . ? 
C17 Mo1 C3 86.26(8) . . ? 
C11 Mo1 C3 130.68(7) . . ? 
C2 Mo1 C3 35.22(7) . . ? 
C1 Mo1 C3 58.66(6) . . ? 
N1 Mo1 C5 122.25(8) . . ? 
C17 Mo1 C5 135.62(8) . . ? 
C11 Mo1 C5 80.10(7) . . ? 
C2 Mo1 C5 58.63(7) . . ? 
C1 Mo1 C5 34.87(6) . . ? 
C3 Mo1 C5 57.23(6) . . ? 
N1 Mo1 C4 150.06(7) . . ? 
C17 Mo1 C4 101.45(8) . . ? 
C11 Mo1 C4 96.76(7) . . ? 
C2 Mo1 C4 57.91(7) . . ? 
C1 Mo1 C4 57.82(6) . . ? 
C3 Mo1 C4 33.93(7) . . ? 
C5 Mo1 C4 34.22(6) . . ? 
N1 Mo1 H17A 99.4(8) . . ? 
C17 Mo1 H17A 27.3(8) . . ? 
C11 Mo1 H17A 86.8(8) . . ? 
C2 Mo1 H17A 133.2(8) . . ? 
C1 Mo1 H17A 165.3(8) . . ? 
C3 Mo1 H17A 107.0(8) . . ? 
C5 Mo1 H17A 136.9(8) . . ? 
C4 Mo1 H17A 109.0(8) . . ? 
O1 N1 Mo1 167.53(18) . . ? 
C5 C1 C2 108.13(17) . . ? 
C5 C1 C6 125.83(18) . . ? 
C2 C1 C6 125.94(18) . . ? 
C5 C1 Mo1 76.77(10) . . ? 
C2 C1 Mo1 71.52(10) . . ? 
C6 C1 Mo1 120.66(14) . . ? 
C3 C2 C1 107.67(17) . . ? 
C3 C2 C7 127.07(18) . . ? 
C1 C2 C7 125.04(19) . . ? 
C3 C2 Mo1 76.51(10) . . ? 
C1 C2 Mo1 72.18(10) . . ? 
C7 C2 Mo1 121.26(14) . . ? 
C4 C3 C2 108.19(16) . . ? 
C4 C3 C8 124.69(19) . . ? 
C2 C3 C8 126.69(19) . . ? 
C4 C3 Mo1 74.93(10) . . ? 
C2 C3 Mo1 68.27(10) . . ? 
C8 C3 Mo1 128.35(14) . . ? 
C3 C4 C5 108.11(17) . . ? 
C3 C4 C9 125.49(18) . . ? 
C5 C4 C9 126.26(18) . . ? 
C3 C4 Mo1 71.14(10) . . ? 
C5 C4 Mo1 71.41(10) . . ? 
C9 C4 Mo1 126.47(13) . . ? 
C1 C5 C4 107.87(17) . . ? 
C1 C5 C10 126.44(18) . . ? 
C4 C5 C10 125.34(18) . . ? 
C1 C5 Mo1 68.36(10) . . ? 
C4 C5 Mo1 74.37(10) . . ? 
C10 C5 Mo1 128.06(13) . . ? 
C1 C6 H6A 109.5 . . ? 
C1 C6 H6B 109.5 . . ? 
H6A C6 H6B 109.5 . . ? 
C1 C6 H6C 109.5 . . ? 
H6A C6 H6C 109.5 . . ? 
H6B C6 H6C 109.5 . . ? 
C2 C7 H7A 109.5 . . ? 
C2 C7 H7B 109.5 . . ? 
H7A C7 H7B 109.5 . . ? 
C2 C7 H7C 109.5 . . ? 
H7A C7 H7C 109.5 . . ? 
H7B C7 H7C 109.5 . . ? 
C3 C8 H8A 109.5 . . ? 
C3 C8 H8B 109.5 . . ? 
H8A C8 H8B 109.5 . . ? 
C3 C8 H8C 109.5 . . ? 
H8A C8 H8C 109.5 . . ? 
H8B C8 H8C 109.5 . . ? 
C4 C9 H9A 109.5 . . ? 
C4 C9 H9B 109.5 . . ? 
H9A C9 H9B 109.5 . . ? 
C4 C9 H9C 109.5 . . ? 
H9A C9 H9C 109.5 . . ? 
H9B C9 H9C 109.5 . . ? 
C5 C10 H10A 109.5 . . ? 
C5 C10 H10B 109.5 . . ? 
H10A C10 H10B 109.5 . . ? 
C5 C10 H10C 109.5 . . ? 
H10A C10 H10C 109.5 . . ? 
H10B C10 H10C 109.5 . . ? 
C12 C11 C16 116.97(17) . . ? 
C12 C11 Mo1 124.35(15) . . ? 
C16 C11 Mo1 118.62(14) . . ? 
C13 C12 C11 121.8(2) . . ? 
C13 C12 H12 124.9(17) . . ? 
C11 C12 H12 113.3(17) . . ? 
C14 C13 C12 119.8(2) . . ? 
C14 C13 H13 120.9(16) . . ? 
C12 C13 H13 119.1(16) . . ? 
C15 C14 C13 119.96(19) . . ? 
C15 C14 H14 122.8(18) . . ? 
C13 C14 H14 117.3(18) . . ? 
C14 C15 C16 120.0(2) . . ? 
C14 C15 H15 121.0(17) . . ? 
C16 C15 H15 118.9(18) . . ? 
C15 C16 C11 121.4(2) . . ? 
C15 C16 H16 120.3(18) . . ? 
C11 C16 H16 118.2(18) . . ? 
C18 C17 Mo1 134.38(18) . . ? 
C18 C17 H17A 109.4(17) . . ? 
Mo1 C17 H17A 79.0(17) . . ? 
C18 C17 H17B 112.9(16) . . ? 
Mo1 C17 H17B 107.0(15) . . ? 
H17A C17 H17B 106(2) . . ? 
C21 C18 C19 110.0(3) . . ? 
C21 C18 C20 109.0(3) . . ? 
C19 C18 C20 108.0(2) . . ? 
C21 C18 C17 112.5(2) . . ? 
C19 C18 C17 108.21(19) . . ? 
C20 C18 C17 109.1(2) . . ? 
C18 C19 H19A 109.5 . . ? 
C18 C19 H19B 109.5 . . ? 
H19A C19 H19B 109.5 . . ? 
C18 C19 H19C 109.5 . . ? 
H19A C19 H19C 109.5 . . ? 
H19B C19 H19C 109.5 . . ? 
C18 C20 H20A 109.5 . . ? 
C18 C20 H20B 109.5 . . ? 
H20A C20 H20B 109.5 . . ? 
C18 C20 H20C 109.5 . . ? 
H20A C20 H20C 109.5 . . ? 
H20B C20 H20C 109.5 . . ? 
C18 C21 H21A 109.5 . . ? 
C18 C21 H21B 109.5 . . ? 
H21A C21 H21B 109.5 . . ? 
C18 C21 H21C 109.5 . . ? 
H21A C21 H21C 109.5 . . ? 
H21B C21 H21C 109.5 . . ? 
 
loop_ 
 _geom_torsion_atom_site_label_1 
 _geom_torsion_atom_site_label_2 
 _geom_torsion_atom_site_label_3 
 _geom_torsion_atom_site_label_4 
 _geom_torsion 
 _geom_torsion_site_symmetry_1 
 _geom_torsion_site_symmetry_2 
 _geom_torsion_site_symmetry_3 
 _geom_torsion_site_symmetry_4 
 _geom_torsion_publ_flag 
C17 Mo1 N1 O1 139.5(8) . . . . ? 
C11 Mo1 N1 O1 -105.4(8) . . . . ? 
C2 Mo1 N1 O1 31.7(8) . . . . ? 
C1 Mo1 N1 O1 -4.6(8) . . . . ? 
C3 Mo1 N1 O1 46.9(8) . . . . ? 
C5 Mo1 N1 O1 -24.5(8) . . . . ? 
C4 Mo1 N1 O1 5.8(8) . . . . ? 
N1 Mo1 C1 C5 -149.83(11) . . . . ? 
C17 Mo1 C1 C5 100.91(16) . . . . ? 
C11 Mo1 C1 C5 -55.12(12) . . . . ? 
C2 Mo1 C1 C5 114.55(16) . . . . ? 
C3 Mo1 C1 C5 76.43(12) . . . . ? 
C4 Mo1 C1 C5 36.30(10) . . . . ? 
N1 Mo1 C1 C2 95.61(13) . . . . ? 
C17 Mo1 C1 C2 -13.65(19) . . . . ? 
C11 Mo1 C1 C2 -169.67(12) . . . . ? 
C3 Mo1 C1 C2 -38.12(12) . . . . ? 
C5 Mo1 C1 C2 -114.55(16) . . . . ? 
C4 Mo1 C1 C2 -78.25(12) . . . . ? 
N1 Mo1 C1 C6 -25.80(17) . . . . ? 
C17 Mo1 C1 C6 -135.06(17) . . . . ? 
C11 Mo1 C1 C6 68.91(17) . . . . ? 
C2 Mo1 C1 C6 -121.4(2) . . . . ? 
C3 Mo1 C1 C6 -159.54(19) . . . . ? 
C5 Mo1 C1 C6 124.0(2) . . . . ? 
C4 Mo1 C1 C6 160.33(19) . . . . ? 
C5 C1 C2 C3 0.2(2) . . . . ? 
C6 C1 C2 C3 -176.14(18) . . . . ? 
Mo1 C1 C2 C3 68.92(12) . . . . ? 
C5 C1 C2 C7 175.18(18) . . . . ? 
C6 C1 C2 C7 -1.2(3) . . . . ? 
Mo1 C1 C2 C7 -116.12(19) . . . . ? 
C5 C1 C2 Mo1 -68.70(12) . . . . ? 
C6 C1 C2 Mo1 114.94(19) . . . . ? 
N1 Mo1 C2 C3 158.98(12) . . . . ? 
C17 Mo1 C2 C3 57.43(14) . . . . ? 
C11 Mo1 C2 C3 -99.19(14) . . . . ? 
C1 Mo1 C2 C3 -113.90(17) . . . . ? 
C5 Mo1 C2 C3 -76.38(12) . . . . ? 
C4 Mo1 C2 C3 -35.92(11) . . . . ? 
N1 Mo1 C2 C1 -87.13(13) . . . . ? 
C17 Mo1 C2 C1 171.33(12) . . . . ? 
C11 Mo1 C2 C1 14.71(17) . . . . ? 
C3 Mo1 C2 C1 113.90(17) . . . . ? 
C5 Mo1 C2 C1 37.52(11) . . . . ? 
C4 Mo1 C2 C1 77.98(12) . . . . ? 
N1 Mo1 C2 C7 33.56(17) . . . . ? 
C17 Mo1 C2 C7 -67.99(18) . . . . ? 
C11 Mo1 C2 C7 135.39(16) . . . . ? 
C1 Mo1 C2 C7 120.7(2) . . . . ? 
C3 Mo1 C2 C7 -125.4(2) . . . . ? 
C5 Mo1 C2 C7 158.21(19) . . . . ? 
C4 Mo1 C2 C7 -161.33(19) . . . . ? 
C1 C2 C3 C4 -1.2(2) . . . . ? 
C7 C2 C3 C4 -176.01(19) . . . . ? 
Mo1 C2 C3 C4 64.81(13) . . . . ? 
C1 C2 C3 C8 171.58(18) . . . . ? 
C7 C2 C3 C8 -3.2(3) . . . . ? 
Mo1 C2 C3 C8 -122.4(2) . . . . ? 
C1 C2 C3 Mo1 -66.00(12) . . . . ? 
C7 C2 C3 Mo1 119.2(2) . . . . ? 
N1 Mo1 C3 C4 -144.02(12) . . . . ? 
C17 Mo1 C3 C4 116.97(12) . . . . ? 
C11 Mo1 C3 C4 -1.76(15) . . . . ? 
C2 Mo1 C3 C4 -117.09(16) . . . . ? 
C1 Mo1 C3 C4 -77.76(12) . . . . ? 
C5 Mo1 C3 C4 -36.39(11) . . . . ? 
N1 Mo1 C3 C2 -26.93(16) . . . . ? 
C17 Mo1 C3 C2 -125.94(13) . . . . ? 
C11 Mo1 C3 C2 115.33(13) . . . . ? 
C1 Mo1 C3 C2 39.33(11) . . . . ? 
C5 Mo1 C3 C2 80.70(12) . . . . ? 
C4 Mo1 C3 C2 117.09(16) . . . . ? 
N1 Mo1 C3 C8 93.4(2) . . . . ? 
C17 Mo1 C3 C8 -5.6(2) . . . . ? 
C11 Mo1 C3 C8 -124.35(19) . . . . ? 
C2 Mo1 C3 C8 120.3(2) . . . . ? 
C1 Mo1 C3 C8 159.6(2) . . . . ? 
C5 Mo1 C3 C8 -159.0(2) . . . . ? 
C4 Mo1 C3 C8 -122.6(2) . . . . ? 
C2 C3 C4 C5 1.7(2) . . . . ? 
C8 C3 C4 C5 -171.26(18) . . . . ? 
Mo1 C3 C4 C5 62.22(12) . . . . ? 
C2 C3 C4 C9 177.62(18) . . . . ? 
C8 C3 C4 C9 4.7(3) . . . . ? 
Mo1 C3 C4 C9 -121.86(19) . . . . ? 
C2 C3 C4 Mo1 -60.52(12) . . . . ? 
C8 C3 C4 Mo1 126.52(19) . . . . ? 
N1 Mo1 C4 C3 68.13(19) . . . . ? 
C17 Mo1 C4 C3 -65.15(12) . . . . ? 
C11 Mo1 C4 C3 178.65(12) . . . . ? 
C2 Mo1 C4 C3 37.30(11) . . . . ? 
C1 Mo1 C4 C3 80.47(12) . . . . ? 
C5 Mo1 C4 C3 117.48(16) . . . . ? 
N1 Mo1 C4 C5 -49.34(19) . . . . ? 
C17 Mo1 C4 C5 177.38(11) . . . . ? 
C11 Mo1 C4 C5 61.18(12) . . . . ? 
C2 Mo1 C4 C5 -80.17(12) . . . . ? 
C1 Mo1 C4 C5 -37.00(11) . . . . ? 
C3 Mo1 C4 C5 -117.48(16) . . . . ? 
N1 Mo1 C4 C9 -171.18(17) . . . . ? 
C17 Mo1 C4 C9 55.54(18) . . . . ? 
C11 Mo1 C4 C9 -60.66(18) . . . . ? 
C2 Mo1 C4 C9 158.0(2) . . . . ? 
C1 Mo1 C4 C9 -158.8(2) . . . . ? 
C3 Mo1 C4 C9 120.7(2) . . . . ? 
C5 Mo1 C4 C9 -121.8(2) . . . . ? 
C2 C1 C5 C4 0.8(2) . . . . ? 
C6 C1 C5 C4 177.18(18) . . . . ? 
Mo1 C1 C5 C4 -64.38(12) . . . . ? 
C2 C1 C5 C10 -172.70(17) . . . . ? 
C6 C1 C5 C10 3.7(3) . . . . ? 
Mo1 C1 C5 C10 122.11(18) . . . . ? 
C2 C1 C5 Mo1 65.19(12) . . . . ? 
C6 C1 C5 Mo1 -118.44(19) . . . . ? 
C3 C4 C5 C1 -1.6(2) . . . . ? 
C9 C4 C5 C1 -177.44(18) . . . . ? 
Mo1 C4 C5 C1 60.49(12) . . . . ? 
C3 C4 C5 C10 172.05(17) . . . . ? 
C9 C4 C5 C10 -3.8(3) . . . . ? 
Mo1 C4 C5 C10 -125.90(18) . . . . ? 
C3 C4 C5 Mo1 -62.05(12) . . . . ? 
C9 C4 C5 Mo1 122.07(19) . . . . ? 
N1 Mo1 C5 C1 36.41(14) . . . . ? 
C17 Mo1 C5 C1 -120.67(13) . . . . ? 
C11 Mo1 C5 C1 125.04(12) . . . . ? 
C2 Mo1 C5 C1 -39.10(11) . . . . ? 
C3 Mo1 C5 C1 -80.91(12) . . . . ? 
C4 Mo1 C5 C1 -116.99(16) . . . . ? 
N1 Mo1 C5 C4 153.40(11) . . . . ? 
C17 Mo1 C5 C4 -3.67(16) . . . . ? 
C11 Mo1 C5 C4 -117.97(12) . . . . ? 
C2 Mo1 C5 C4 77.89(12) . . . . ? 
C1 Mo1 C5 C4 116.99(16) . . . . ? 
C3 Mo1 C5 C4 36.09(11) . . . . ? 
N1 Mo1 C5 C10 -83.65(19) . . . . ? 
C17 Mo1 C5 C10 119.27(18) . . . . ? 
C11 Mo1 C5 C10 4.98(17) . . . . ? 
C2 Mo1 C5 C10 -159.2(2) . . . . ? 
C1 Mo1 C5 C10 -120.1(2) . . . . ? 
C3 Mo1 C5 C10 159.0(2) . . . . ? 
C4 Mo1 C5 C10 122.9(2) . . . . ? 
N1 Mo1 C11 C12 26.62(17) . . . . ? 
C17 Mo1 C11 C12 128.81(17) . . . . ? 
C2 Mo1 C11 C12 -75.79(19) . . . . ? 
C1 Mo1 C11 C12 -67.00(17) . . . . ? 
C3 Mo1 C11 C12 -124.44(16) . . . . ? 
C5 Mo1 C11 C12 -95.43(16) . . . . ? 
C4 Mo1 C11 C12 -125.43(16) . . . . ? 
N1 Mo1 C11 C16 -150.44(15) . . . . ? 
C17 Mo1 C11 C16 -48.24(17) . . . . ? 
C2 Mo1 C11 C16 107.16(16) . . . . ? 
C1 Mo1 C11 C16 115.95(15) . . . . ? 
C3 Mo1 C11 C16 58.51(17) . . . . ? 
C5 Mo1 C11 C16 87.52(15) . . . . ? 
C4 Mo1 C11 C16 57.51(15) . . . . ? 
C16 C11 C12 C13 0.3(3) . . . . ? 
Mo1 C11 C12 C13 -176.76(16) . . . . ? 
C11 C12 C13 C14 0.3(3) . . . . ? 
C12 C13 C14 C15 -0.7(3) . . . . ? 
C13 C14 C15 C16 0.5(3) . . . . ? 
C14 C15 C16 C11 0.2(3) . . . . ? 
C12 C11 C16 C15 -0.6(3) . . . . ? 
Mo1 C11 C16 C15 176.70(16) . . . . ? 
N1 Mo1 C17 C18 -14.2(2) . . . . ? 
C11 Mo1 C17 C18 -113.0(2) . . . . ? 
C2 Mo1 C17 C18 84.6(2) . . . . ? 
C1 Mo1 C17 C18 93.0(2) . . . . ? 
C3 Mo1 C17 C18 113.7(2) . . . . ? 
C5 Mo1 C17 C18 146.34(19) . . . . ? 
C4 Mo1 C17 C18 144.2(2) . . . . ? 
Mo1 C17 C18 C21 40.0(3) . . . . ? 
Mo1 C17 C18 C19 -81.7(3) . . . . ? 
Mo1 C17 C18 C20 161.1(2) . . . . ? 
 
_diffrn_measured_fraction_theta_max    0.902 
_diffrn_reflns_theta_full              27.88 
_diffrn_measured_fraction_theta_full   0.902 
_refine_diff_density_max    0.943 
_refine_diff_density_min   -0.658 
_refine_diff_density_rms    0.070 
